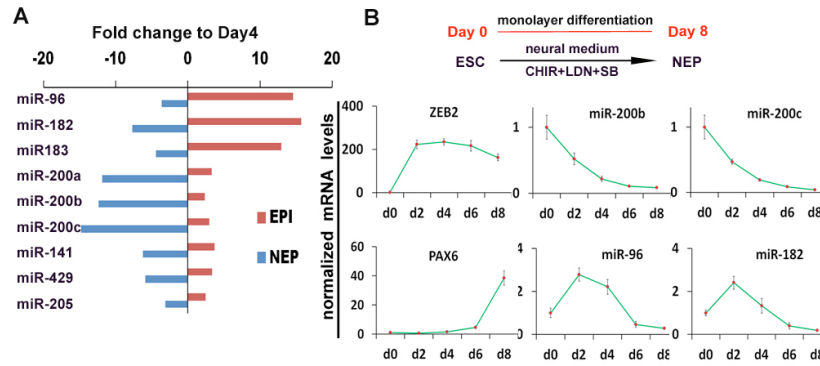

**Fig. S1. The expression pattern of miR-200 and miR-96 families during neural induction from hESCs.** (A) The differential expression of nine members of miR-200 and miR-96 families in day 10 NEP and EPI cells differentiated from hESC line H1. (B) The expression of ZEB2/miR-200 and PAX6/miR-96 was quantified by qPCR during hESC differentiation using the dual Nodal/BMP inhibition method. The relative gene expression levels were normalized to day 0 hESCs.

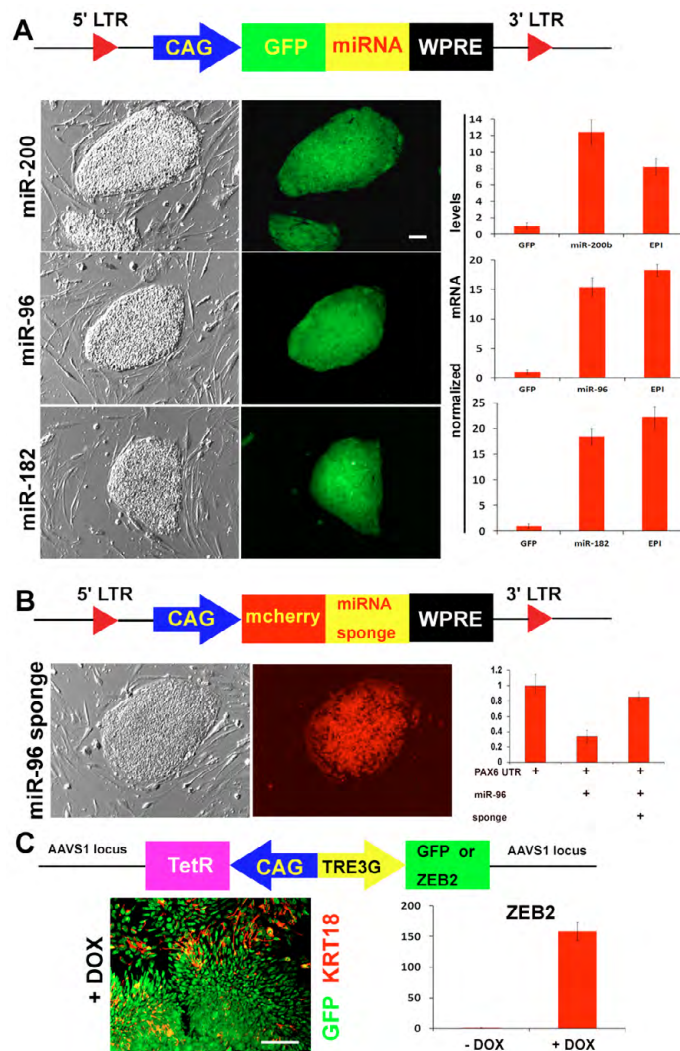

**Fig. S2. Establishment of miRNA overexpressing and miRNA sponge hESC lines.** (A) The structure of lentiviral vector for overexpressing miRNAs. The miR-200, miR-96 and miR-182 hESCs were visualized under phase-contrast and fluorescent microscopy. Scale bars: 50  $\mu$ m. The right column shows the miRNA levels of corresponding cell lines at day 10 of differentiation when compared with the control GFP hESCs and EPI cells. (B) The structure of lentiviral vector for expressing miRNA sponge. The miR-96-182 sponge hESCs were visualized under phase-contrast and fluorescent microscopy. Scale bars: 50  $\mu$ m. The right column showed the inhibiting activity of miR-96-182 sponge in the reporter assay. (C) Shown is the structure of the inducible expression system in the AAVS1 locus. Induced GFP expression was visualized under fluorescent microscopy in EPI cells (red). Scale bars: 50  $\mu$ m. Induced ZEB2 expression was quantified by qPCR.

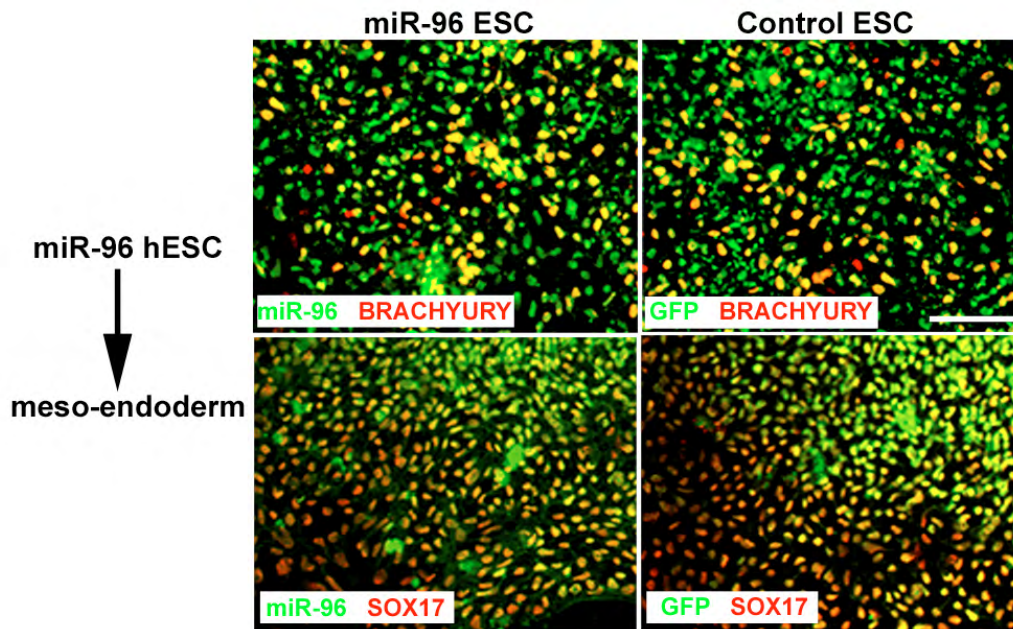

**Fig. S3. Overexpression of miR-96 family does not interfere with meso-endoderm differentiation from hESCs.** The miR-96 hESCs (left) and GFP control hESCs (right) were differentiated toward meso-endoderm lineages, and stained for mesoderm marker brachyury and endoderm marker SOX17. Scale bars: 50  $\mu$ m.

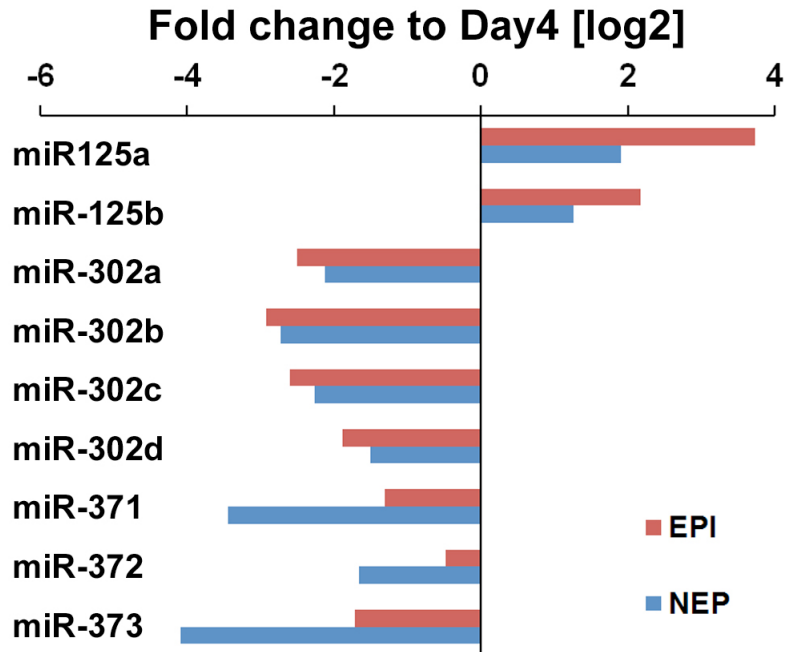

**Fig. S4. The expression pattern of miR-125, miR-302 and miR-371 families.** The expression of members of miR-125, miR-302 and miR-371 families was compared during hESC differentiation into the neuroectoderm (NEP) with that of the epidermis (EPI) at day 10.

**Table S1. Fold change of miRNAs in day 10 NEP and EPI cells when compared with day 4 cells (shown as log<sub>2</sub>)**

| <b>miRNA</b> | <b>NEP</b> | <b>EPI</b> |
|--------------|------------|------------|
| let-7b       | -2.781158  | -2.904227  |
| miR-1        | 7.388859   | 5.373822   |
| miR-100      | 2.096294   | 2.858324   |
| miR-122a     | -3.659820  | -2.049011  |
| miR-125a     | 1.912681   | 3.732400   |
| miR-125b     | 1.267455   | 2.168344   |
| miR-149      | 1.896574   | 2.391545   |
| miR-181a     | 2.154590   | 3.481077   |
| miR-181b     | 2.646930   | 3.764541   |
| miR-181c     | 2.558172   | 3.934785   |
| miR-181d     | 2.683006   | 3.770286   |
| miR-199a     | 1.629753   | 1.917602   |
| miR-199b     | 2.173490   | 2.128746   |
| miR-216a     | 1.995136   | 2.034965   |
| miR-216b     | 2.899187   | 2.256661   |
| miR-217      | 4.393095   | 3.552109   |
| miR-26b      | 2.269018   | 2.055425   |
| miR-27a      | 3.883983   | 2.003635   |
| miR-28       | 1.790957   | 2.519526   |
| miR-29c      | 2.180244   | 3.367905   |
| miR-301a     | 2.303150   | 2.459690   |
| miR-301b     | 1.937745   | 2.334515   |
| miR-302a     | -2.125153  | -2.505480  |
| miR-302b     | -2.726693  | -2.925864  |
| miR-302c     | -2.268908  | -2.596383  |
| miR-302d     | -1.500470  | -1.887767  |
| miR-31       | 3.382716   | 3.718355   |
| miR-371      | -3.444514  | -1.302560  |
| miR-373      | -4.091098  | -1.720301  |
| miR-432      | 2.704942   | 1.688595   |
| miR-495      | -15.18792  | -18.46438  |
| miR-515      | -4.297706  | -1.994740  |
| miR-516b     | -2.706411  | -3.153307  |
| miR-517a     | -3.769689  | -3.043031  |
| miR-517b     | -3.351724  | -1.884623  |
| miR-517c     | -3.944521  | -2.659739  |
| miR-518b     | -2.996644  | -3.478819  |
| miR-518c     | -3.444238  | -4.019979  |
| miR-518d     | -3.712232  | -1.994429  |
| miR-518e     | -3.602468  | -3.060808  |

|          |           |           |
|----------|-----------|-----------|
| miR-518f | -4.159568 | -2.816399 |
| miR-519a | -3.662864 | -2.817062 |
| miR-519d | -3.187913 | -2.696241 |
| miR-520a | -3.172559 | -2.756888 |
| miR-520b | -2.427431 | -3.271626 |
| miR-520g | -4.083886 | -4.088064 |
| miR-522  | -4.611940 | -2.272161 |
| miR-523  | -3.541162 | -2.967402 |
| miR-524  | -2.629966 | -1.921285 |
| miR-525  | -3.885591 | -3.721121 |
| miR-526b | -2.376941 | -2.360448 |
| miR-614  | -2.086076 | -2.298528 |
| miR-626  | 2.352647  | 2.446251  |
| miR-663  | -2.171612 | -2.190557 |
| miR-9    | 3.360588  | 3.145603  |
| miR-92a  | 4.278383  | 2.939442  |
| miR-99a  | 2.892189  | 3.902149  |

**Table S2. Oligonucleotides used in qPCR, cloning and mutagenesis studies**

| <b>Primer</b>             | <b>Sequence</b>                      |
|---------------------------|--------------------------------------|
| <b>qPCR</b>               |                                      |
| <b>ZEB1 forward</b>       | CTACAACAACAAGACACTGCTGT              |
| <b>ZEB1 reverse</b>       | TGTTCTTTCAGAGAGGTAAAGCG              |
| <b>ZEB2 forward</b>       | CAA GAG GCG CAA ACA AGC              |
| <b>ZEB2 reverse</b>       | GGT TGG CAA TAC CGT CAT CC           |
| <b>CDH2 forward</b>       | CAGGGTGGACGTCATTGTAG                 |
| <b>CDH2 reverse</b>       | AGGGTCTCCACCACTGATTC                 |
| <b>EOMES forward</b>      | ATCATTACGAAACAGGGCAGGC               |
| <b>EOMES reverse</b>      | CGGGGTTGGTATTTGTGTAAGG               |
| <b>SOX7 forward</b>       | ACGCCGAGCTCAGCAAGAT                  |
| <b>SOX7 reverse</b>       | TCCACGTACGGCCTCTTCTG                 |
| <b>Cloning</b>            |                                      |
| <b>miR-200 forward</b>    | GTCGACCCACTCCGACCTAGTCCTC            |
| <b>miR-200 reverse</b>    | GCGGCCGCCTCCGGGTATCTGTGACTGTGAC      |
| <b>miR-96 forward</b>     | CTCGAGTCCTTGAAGGTCATCTTGGGCT         |
| <b>miR-96 reverse</b>     | GCGGCCGCAGGCAGTGTAAGGCGATCT          |
| <b>miR-182 forward</b>    | CTCGAGATGCCTGCCACAGGAACT             |
| <b>miR-182 reverse</b>    | GCGGCCGCTGCAGGGAAACACAGAGTGTC        |
| <b>PAX6 3'UTR forward</b> | GTTTAAACGGGACACAACAGTTGAGCTTTC       |
| <b>PAX6 3'UTR reverse</b> | GTCGACAGGCTGACAATGGAAATCTGCC         |
| <b>ZEB2 3'UTR forward</b> | GTTTAAACATACTAGTGGAGTTGGAGCTGGGTATTG |

|                           |                                                                 |
|---------------------------|-----------------------------------------------------------------|
| <b>ZEB2 3'UTR reverse</b> | GTCGACACTAGTTGGAATCAGGATCAGTTGAGAA                              |
| <b>TS1 site forward</b>   | AAACAGATATAAATTCAAGGAAGAAAAAAGTTGA<br>TAGCTAAAAGGTAGAGTGTC      |
| <b>TS1 site reverse</b>   | TCGAGACACTCTACCTTTTAGCTATCAACTTTTTTCT<br>TCCTTGAATTTATATCTGTTT  |
| <b>TS2 site forward</b>   | AAACCAAATTAACCATTGTTGATTGTAAAAACCA<br>TGCCAAAGCCTTTGTATTC       |
| <b>TS2 site reverse</b>   | TCGAGAATACAAAGGCTTTGGCATGGTTTTTTACAAT<br>CAACAATGGTTAATTTTGGTTT |
| <b>Mutagenesis</b>        |                                                                 |
| <b>TS1 site</b>           | ATTCAAGGAAGAAAAAAGTTGATAGGGAAAAGGT<br>AGAGTGTGTCT               |
| <b>TS2 site</b>           | AAAATTAACCATTGTTGATTGTAAAAAACCATGGGA<br>AAGCCTTTGTATTC          |
